# Supplementary material for: Development of label-free gold nanoparticle based rapid colorimetric assay for clinical/point-of-care screening of cervical cancer
Source: PubMed Central journal article supplement — Nanoscale Adv. 2020 Oct 7;2(12):5737–45. doi: 10.1039/d0na00686f (PMC9419083; doi:10.1039/d0na00686f), 2020-10-07
Supplement: NA-002-D0NA00686F-s001.pdf [file NA-002-D0NA00686F-s001.pdf]

## Development of label-free gold nanoparticles based rapid colorimetric assay for clinical/point-of-care screening of cervical cancer

Tejaswini Appidi<sup>a</sup>, Sushma V Mudigunda<sup>a</sup>, Suseela Kodandapani<sup>b</sup>, Aravind Kumar Rengan<sup>a\*</sup>

a. Dept. of Biomedical Engineering, Indian Institute of Technology Hyderabad, India.

b. Dept. of Pathology, Basavatarakam Indo-American Cancer Hospital & Research Institute, Hyderabad, India.

\*Corresponding author email: [aravind@bme.iith.ac.in](mailto:aravind@bme.iith.ac.in)

### Supporting Information

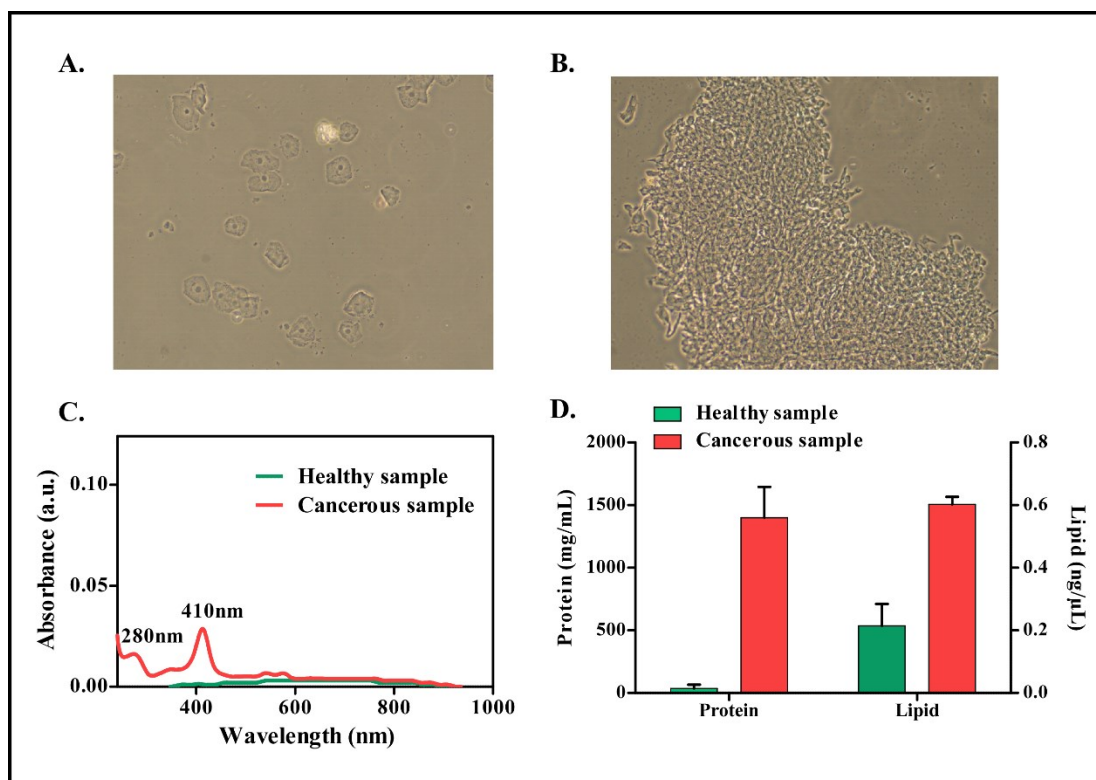

**Figure S1:** Clinical Samples. Microscopic images of A. Healthy & B. Cancerous cervical fluid samples. (Images were captured at 20X magnification), C. Absorbance spectra of the clinical samples, D. Estimation of protein and lipid content in the clinical samples.

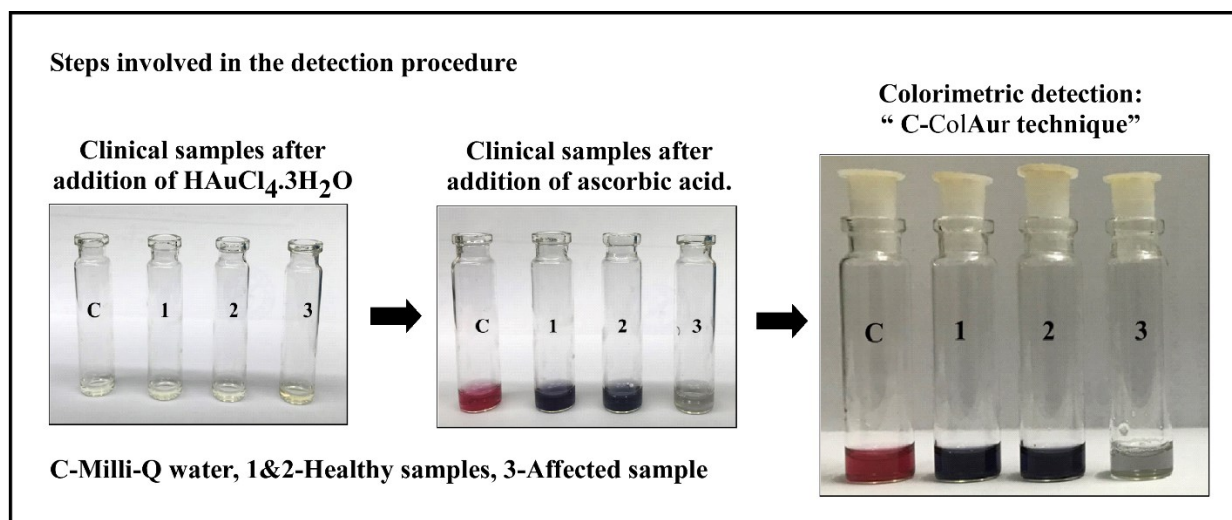

Figure S2: The step by step process of detection of clinical samples.

Table 1: Size and surface charge analysis of blank, control & test Au NPs

| Measurement          | Au NPs       |               |                |
|----------------------|--------------|---------------|----------------|
|                      | Blank (B)    | Control (C)   | Test (T)       |
| Size (TEM)           | 25-40 nm     | 15-30 nm      | 250-300 nm     |
| Size (DLS -Volume)   | 23.4±15.15nm | 834.8±611.9nm | 252.2±111.48nm |
| PDI                  | 0.420        | 0.537         | 0.195          |
| Zeta Potential (15V) | 9.28mV       | 24.83 mV      | -1.08 mV       |

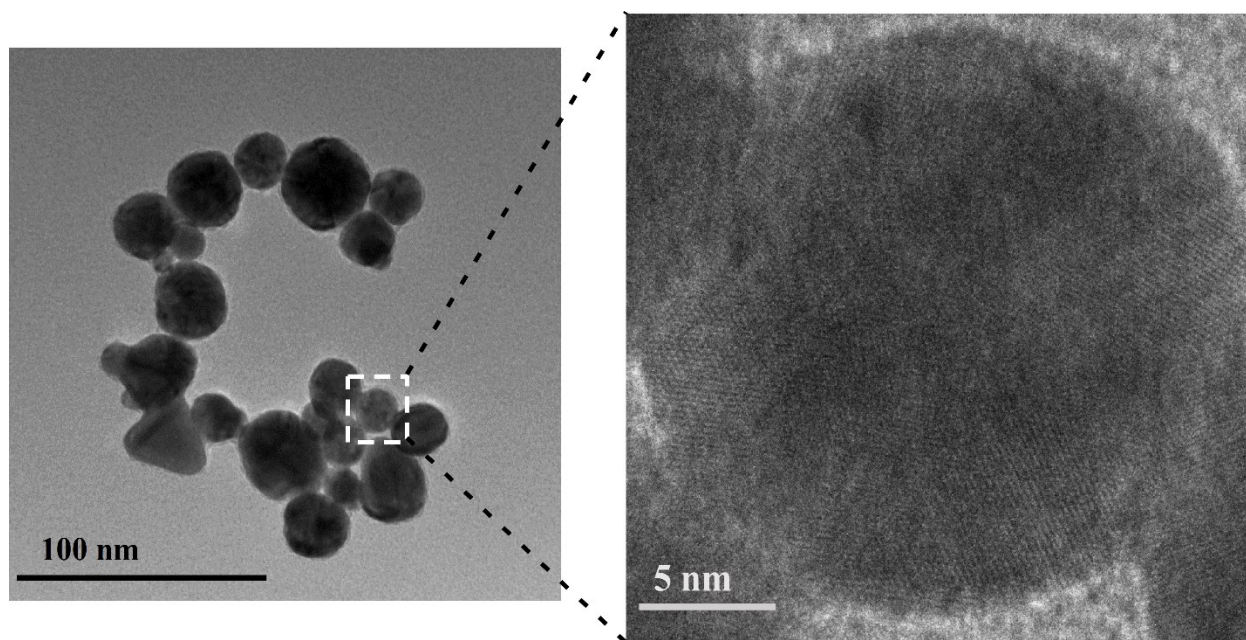

Figure S3: HRTEM imaging of blank Au NPs.

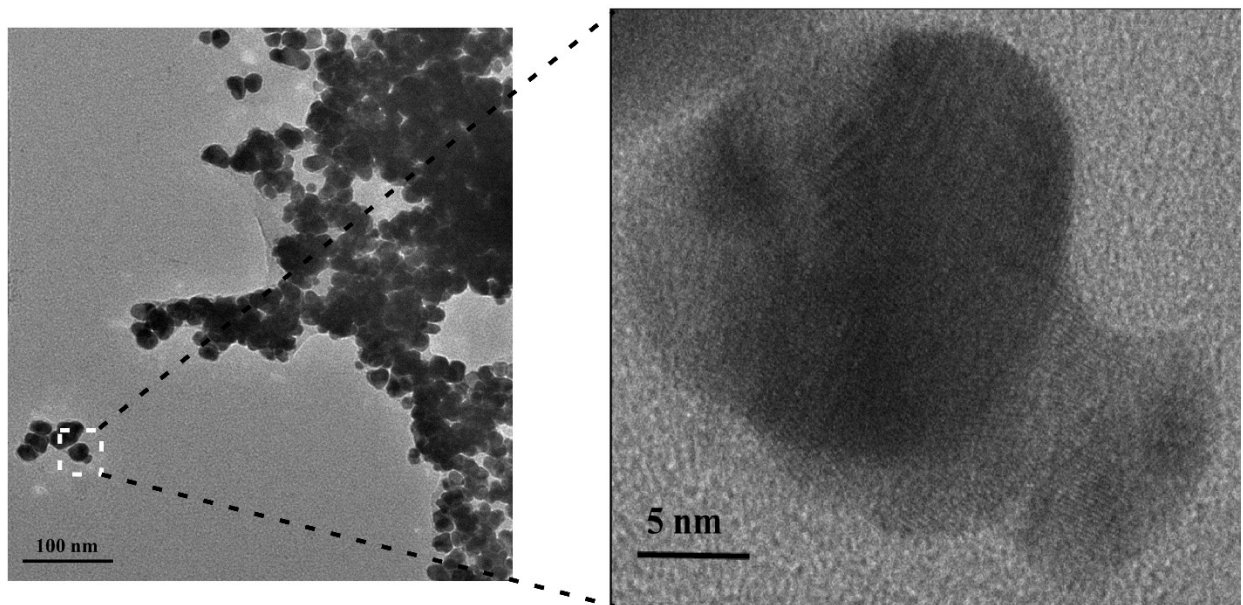

Figure S4: HRTEM imaging of control Au NPs

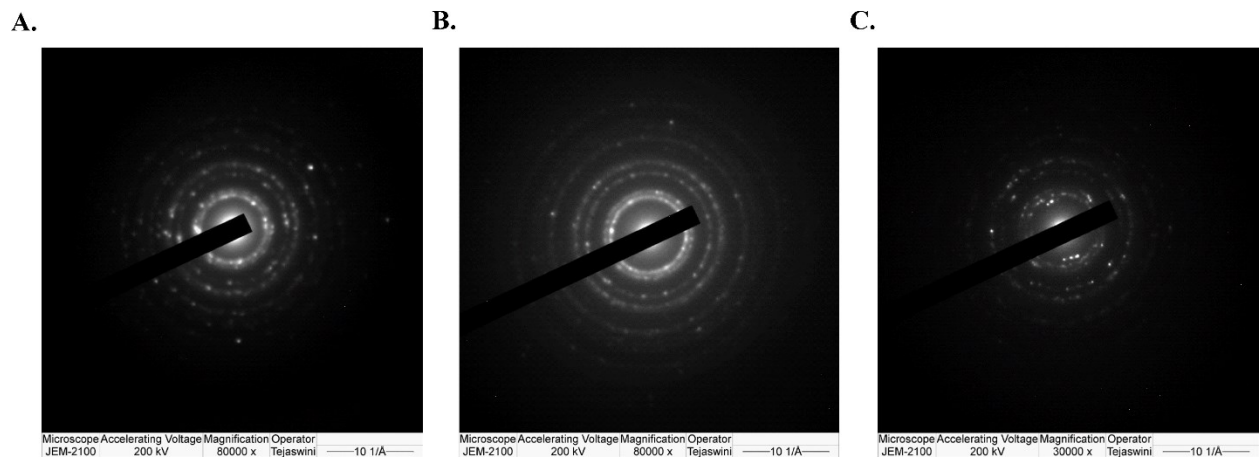

Figure S5: SAED patterns of A) blank, B) control & C) test Au NPs.

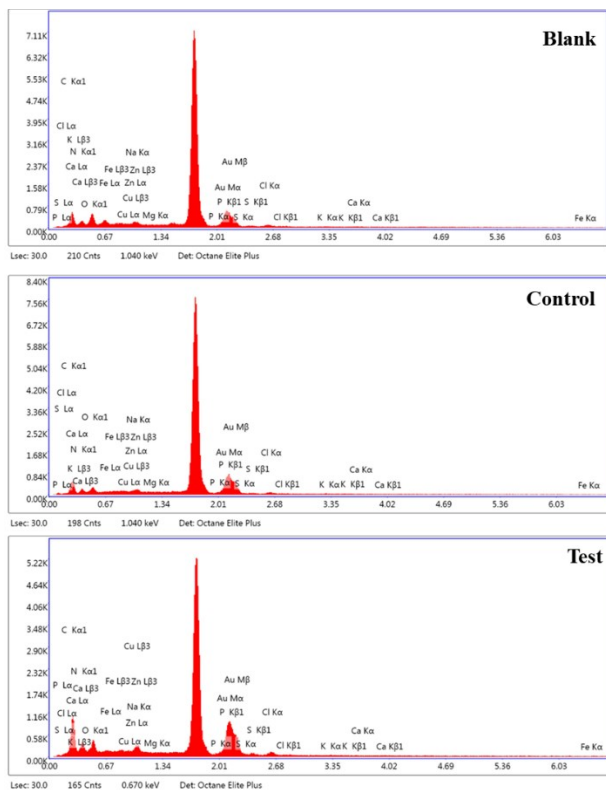

| Element     | Au NPs (Weight %) |         |       |
|-------------|-------------------|---------|-------|
|             | Blank             | Control | Test  |
| <b>C K</b>  | 11.63             | 11.89   | 19.78 |
| <b>N K</b>  | 4.34              | 3.21    | 7.45  |
| <b>O K</b>  | 10.33             | 4.96    | 6.17  |
| <b>Fe L</b> | 6.50              | 0.65    | 1.62  |
| <b>Cu L</b> | 1.49              | 0.84    | 1.06  |
| <b>Zn L</b> | 2.07              | 1.40    | 1.95  |
| <b>Na K</b> | 1.75              | 1.45    | 1.86  |
| <b>Mg K</b> | 0.25              | 0.31    | 0.31  |
| <b>P K</b>  | 0.00              | 0.00    | 0.00  |
| <b>Au M</b> | 56.18             | 71.19   | 56.73 |
| <b>S K</b>  | 0.01              | 0.01    | 0.00  |
| <b>Cl K</b> | 3.40              | 2.66    | 2.62  |
| <b>K K</b>  | 0.70              | 0.80    | 0.27  |
| <b>Ca K</b> | 1.37              | 0.64    | 0.18  |

Figure S6: EDS analysis of A) blank, B) control & C) test Au NPs.

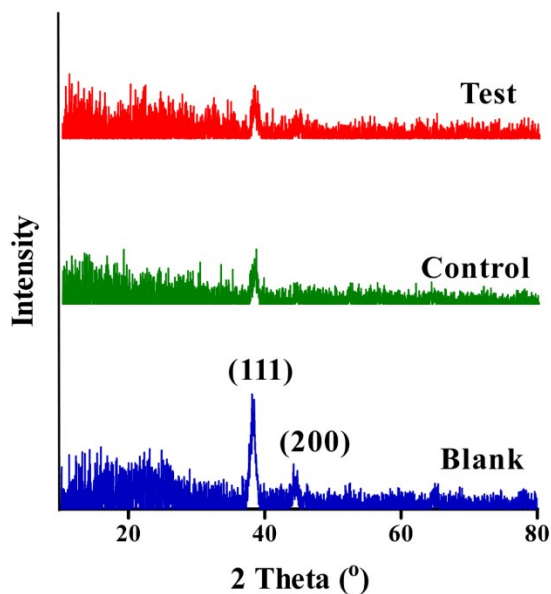

Figure S7: XRD analysis of blank, control & test Au NPs.



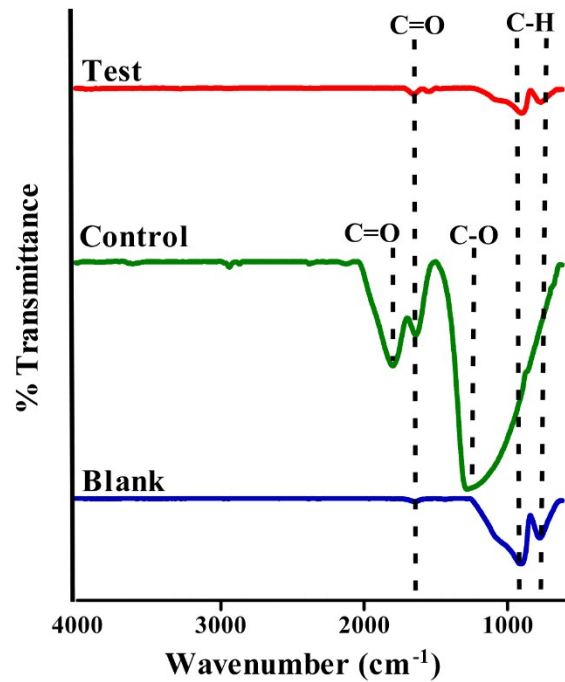

Figure S8: FTIR analysis of blank, control & test Au NPs.

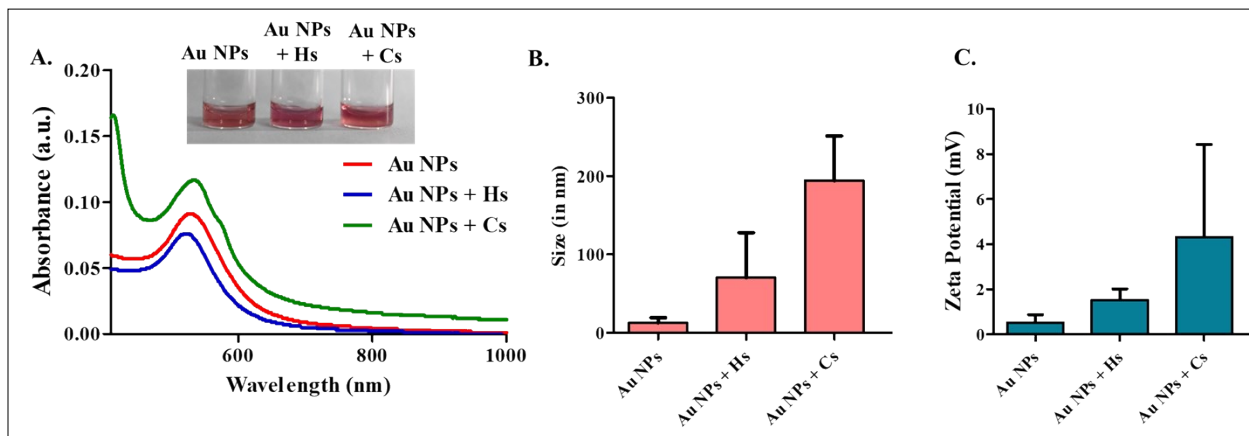

Figure S9: A. UV-visible spectra, B. Hydrodynamic size and, C. Zeta potential of Au NPs before and after addition of clinical samples (Hs: Healthy sample, Cs: Cancerous sample). Inset in Figure A shows the Au NPs before and after clinical sample addition.

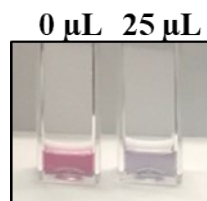

**Figure S10:** Immediate color change of blank Au NPs with the addition of SSC buffer.

**Table 2:** Size and surface charge analysis of blank Au NPs treated with SSC buffer.

| Measurement      | Blank (B) Au NPs |                  |
|------------------|------------------|------------------|
|                  | 0 $\mu$ L SSC    | 100 $\mu$ L SSC  |
| Size (Intensity) | 76.0 nm          | 1421.5 nm        |
| Size (Volume)    | <b>23.4 nm</b>   | <b>3005.2 nm</b> |
| Size ( Number)   | 11.3 nm          | 283.7 nm         |
| PDI              | 0.420            | 0.885            |
| Zeta (15V)       | 9.28 mV          | 10.67 mV         |

**Table 3:** Comparison of “C-ColAur” results against gold standard (Pap smear(P)/Biopsy(B)): Healthy Samples

| S. No | Date of sample collection | Sample ID  | Conventional diagnosis/screening Test (P/B) | Result using conventional test | Cer-ColAur technique |
|-------|---------------------------|------------|---------------------------------------------|--------------------------------|----------------------|
| 1.    | 08/05/2019                | 05/01/01   | P                                           | -Ve                            | -Ve                  |
| 2.    | 08/05/2019                | 05/02/69   | P                                           | -Ve                            | -Ve                  |
| 3.    | 08/05/2019                | 05/03/08   | P                                           | -Ve                            | +Ve                  |
| 4.    | 11/05/2019                | 05/04/TM07 | P                                           | -Ve                            | -Ve                  |
| 5.    | 16/05/2019                | 05/08/TM21 | P                                           | -Ve                            | -Ve                  |
| 6.    | 18/06/2019                | 06/04/TM39 | P                                           | -Ve                            | +Ve                  |
| 7.    | 18/06/2019                | 06/05/TM40 | P                                           | -Ve                            | -Ve                  |
| 8.    | 25/06/2019                | 06/06/TM13 | P                                           | -Ve                            | -Ve                  |

|     |            |            |   |     |     |
|-----|------------|------------|---|-----|-----|
| 9.  | 25/06/2019 | 06/09/TM23 | P | -Ve | -Ve |
| 10. | 09/07/2019 | 07/04/MR78 | P | -Ve | +Ve |
| 11. | 09/07/2019 | 07/06/MR70 | B | -Ve | +Ve |
| 12. | 09/03/2018 | 03/01      | P | -Ve | -Ve |
| 13. | 10/03/2018 | 03/03      | P | -Ve | -Ve |
| 14. | 10/03/2018 | 03/04      | P | -Ve | -Ve |

**Table 4: Comparison of “C-ColAur” results against gold standard (Pap smear(P)/Biopsy(B)):  
Cancerous samples**

| S. No | Date of sample collection | Sample ID  | Conventional diagnosis/screening Test (P/B) | Result using conventional test | Cer-ColAur technique |
|-------|---------------------------|------------|---------------------------------------------|--------------------------------|----------------------|
| 1.    | 30/04/2019                | 04/01/MR33 | P                                           | +Ve                            | +Ve                  |
| 2.    | 30/04/2019                | 04/02/MR04 | B                                           | +Ve                            | +Ve                  |
| 3.    | 30/04/2019                | 04/04/MR32 | B                                           | +Ve                            | -Ve                  |
| 4.    | 15/05/2019                | 05/05/MR21 | B                                           | +Ve                            | +Ve                  |
| 5.    | 16/05/2019                | 05/06/MR30 | B                                           | +Ve                            | +Ve                  |
| 6.    | 16/05/2019                | 05/07/30   | B                                           | +Ve                            | +Ve                  |
| 7.    | 21/05/2019                | 05/09/MR59 | B                                           | +Ve                            | +Ve                  |
| 8.    | 21/05/2019                | 05/10/MR47 | P                                           | +Ve                            | +Ve                  |
| 9.    | 21/05/2019                | 05/11/MR73 | B                                           | +Ve                            | +Ve                  |

|     |            |            |     |     |     |
|-----|------------|------------|-----|-----|-----|
| 10. | 23/05/2019 | 05/12/MR72 | B   | +Ve | +Ve |
| 11. | 18/06/2019 | 06/01/MR96 | B   | +Ve | +Ve |
| 12. | 18/06/2019 | 06/02/MR09 | B   | +Ve | +Ve |
| 13. | 18/06/2019 | 06/03/MR49 | B   | +Ve | +Ve |
| 14. | 25/06/2019 | 06/07/MR77 | B   | +Ve | +Ve |
| 15. | 25/06/2019 | 06/08/MR76 | B   | +Ve | +Ve |
| 16. | 02/07/2019 | 07/01/MR70 | B   | +Ve | +Ve |
| 17. | 09/07/2019 | 07/02/MR51 | B,D | +Ve | +Ve |
| 18. | 09/07/2019 | 07/03/MR62 | B   | +Ve | +Ve |
| 19. | 09/07/2019 | 07/05/MR82 | B   | +Ve | +Ve |
| 20. | 16/07/2019 | 07/07/MR36 | B   | +Ve | +Ve |
| 21. | 16/07/2019 | 07/08/MR62 | B   | +Ve | +Ve |
| 22. | 16/07/2019 | 07/09/MR31 | B   | +Ve | +Ve |
| 23. | 16/07/2019 | 07/10/MR47 | B   | +Ve | +Ve |
| 24. | 23/07/2019 | 07/11/MR98 | B   | +Ve | +Ve |
| 25. | 20/08/2019 | 08/01/MR56 | B   | +Ve | +Ve |
| 26. | 27/08/2019 | 08/02/MR11 | B   | +Ve | +Ve |
| 27. | 09/03/2018 | 03/02      | B,D | +Ve | +Ve |
| 28. | 10/03/2018 | 03/05      | B,D | +Ve | +Ve |

\*Either Pap test (P) or biopsy (B) were performed in the hospital depending on prior diagnosis. For patients who already had a PAP smear were diagnosed by biopsy. For few patients, diagnosis was performed and doctor's observation (D) was considered as conventional diagnosis.

**Table 5: Calculation of sensitivity and specificity for pre-treatment samples.**

|               | <b>Gold standard (Disease present)</b> | <b>Gold standard (Disease absent)</b> |                                |
|---------------|----------------------------------------|---------------------------------------|--------------------------------|
| Test Positive | True Positives (a): 27                 | False positives (b): 4                | Total test positives(a+b): 31  |
| Test Negative | False negatives (c):1                  | True negatives (d): 10                | Total test negatives(c+d): 11  |
|               | Total diseased (a+c): 28               | Total normal (b+d): 14                | Total population (a+b+c+d): 42 |

Sensitivity:  $a/(a+c)$ : **96.42%**

Specificity:  $d/(b+d)$ : **71.42%**

Positive Predictive Value:  $a/(a+b)$ : **87.09 %**



Negative predictive value:  $d/(c+d)$ : **90.9%**

**Table 6: Calculation of sensitivity and specificity for post-treatment samples.**

|               | <b>Gold standard (Disease present)</b> | <b>Gold standard (Disease absent)</b> |                                |
|---------------|----------------------------------------|---------------------------------------|--------------------------------|
| Test Positive | True Positives (a): 3                  | False positives (b): 2                | Total test positives(a+b): 5   |
| Test Negative | False negatives (c): 1                 | True negatives (d): 14                | Total test negatives(c+d): 15  |
|               | Total diseased (a+c): 4                | Total normal (b+d): 16                | Total population (a+b+c+d): 20 |

Sensitivity:  $a/(a+c)$ : **75%**

Specificity:  $d/(b+d)$ : **87.5%**
